# Supplementary material
Source: publisher site journal article supplement (https://www.dovepress.com/article/342846)
Supplement: Supplementary file 1 [file get_supplementary_file.php]

**Supplementary Tables**

**Supplementary Table 1** Correlations of fecal biomarkers with conventional blood indicators

| Parameters | CD | | | UC | | | IBD | | |
| --- | --- | --- | --- | --- | --- | --- | --- | --- | --- |
| n | ρ | *P* | n | ρ | *P* | n | ρ | *P* |
| FC-OSM | 145 | 0.21 | 0.011 | 91 | 0.642 | < 0.001 | 236 | 0.4 | < 0.001 |
| FC-WBC | 127 | 0.333 | < 0.001 | 60 | 0.504 | < 0.001 | 187 | 0.381 | < 0.001 |
| FC-HB | 127 | -0.275 | 0.002 | 60 | -0.479 | < 0.001 | 187 | -0.363 | < 0.001 |
| FC-PLT | 127 | 0.307 | < 0.001 | 60 | 0.429 | 0.001 | 187 | 0.356 | < 0.001 |
| FC-ESR | 118 | 0.528 | < 0.001 | 51 | 0.579 | < 0.001 | 169 | 0.558 | < 0.001 |
| FC-ALB | 123 | -0.582 | < 0.001 | 55 | -0.588 | < 0.001 | 178 | -0.586 | < 0.001 |
| FC-CRP | 118 | 0.64 | < 0.001 | 52 | 0.696 | < 0.001 | 170 | 0.663 | < 0.001 |
| FC-T-Bili | 121 | -0.438 | < 0.001 | 55 | -0.356 | 0.008 | 176 | -0.421 | < 0.001 |
| FC-BUN | 109 | -0.276 | 0.004 | 53 | -0.228 | 0.101 | 162 | -0.255 | 0.001 |
| OSM-WBC | 127 | 0.127 | 0.154 | 60 | 0.247 | 0.057 | 187 | 0.183 | 0.012 |
| OSM-HB | 127 | -0.111 | 0.213 | 60 | -0.243 | 0.061 | 187 | -0.167 | 0.022 |
| OSM-PLT | 127 | 0.113 | 0.205 | 60 | 0.324 | 0.012 | 187 | 0.17 | 0.02 |
| OSM-ESR | 118 | 0.243 | 0.008 | 51 | 0.269 | 0.057 | 169 | 0.239 | 0.002 |
| OSM-ALB | 123 | -0.208 | 0.021 | 55 | -0.318 | 0.018 | 178 | -0.258 | 0.001 |
| OSM-CRP | 118 | 0.287 | 0.002 | 52 | 0.411 | 0.002 | 170 | 0.298 | < 0.001 |
| OSM-T-Bili | 121 | -0.200 | 0.028 | 55 | -0.183 | 0.181 | 176 | -0.227 | 0.002 |
| OSM-BUN | 109 | -0.148 | 0.125 | 53 | -0.099 | 0.48 | 162 | -0.131 | 0.096 |

**Supplementary Table 2** ROC curve analysis of conventional blood indicators for identifying mucosal healing

| Parameters | AUC | *P* | 95% CI |
| --- | --- | --- | --- |
| WBC | 0.79 | 0.001 | 0.664-0.917 |
| HB | 0.621 | 0.17 | 0.46-0.782 |
| PLT | 0.805 | 0.001 | 0.679-0.932 |
| ESR | 0.845 | <0.001 | 0.736-0.954 |
| ALB | 0.699 | 0.024 | 0.556-0.843 |
| CRP | 0.88 | <0.001 | 0.784-0.975 |
| T-Bili | 0.691 | 0.031 | 0.539-0.843 |
| BUN | 0.644 | 0.103 | 0.487-0.802 |

**Supplementary Table 3** ROC curve analysis of conventional blood indicators for predicting therapeutic response

| Parameters | Week 28 | | | Week 52 | | |
| --- | --- | --- | --- | --- | --- | --- |
| AUC | *P* | 95% CI | AUC | *P* | 95% CI |
| WBC | 0.579 | 0.537 | 0.366-0.792 | 0.582 | 0.384 | 0.385-0.779 |
| HB | 0.643 | 0.263 | 0.421-0.866 | 0.507 | 0.941 | 0.323-0.691 |
| PLT | 0.812 | 0.015 | 0.666-0.958 | 0.606 | 0.259 | 0.413-0.799 |
| ESR | 0.694 | 0.129 | 0.517-0.872 | 0.628 | 0.174 | 0.456-0.8 |
| ALB | 0.688 | 0.142 | 0.475-0.901 | 0.622 | 0.194 | 0.454-0.79 |
| CRP | 0.662 | 0.205 | 0.5-0.825 | 0.569 | 0.462 | 0.402-0.736 |
| T-Bili | 0.722 | 0.083 | 0.517-0.928 | 0.611 | 0.239 | 0.429-0.792 |
| BUN | 0.581 | 0.526 | 0.308-0.854 | 0.652 | 0.106 | 0.473-0.831 |
